# Supplementary material for: Treatment outcomes regarding the addition of targeted agents in the therapeutic portfolio for stage II-III rectal cancer undergoing neoadjuvant chemoradiation
Source: PubMed Central journal article supplement (PMC5731917; doi:10.18632/oncotarget.21762), 2017-10-10
Supplement: oncotarget-08-101832-s001.pdf [file oncotarget-08-101832-s001.pdf]

## **Treatment outcomes regarding the addition of targeted agents in the therapeutic portfolio for stage II-III rectal cancer undergoing neoadjuvant chemoradiation**

### **SUPPLEMENTARY MATERIALS**

**Supplementary Video 1: Video of control normal liver.**

**See Supplementary Video 1**

**Supplementary Video 2: Mild steatosis and sinusoidal dilatation.**

**See Supplementary Video 2**

**Supplementary Video 3: Mild steatosis without sinusoidal dilatation.**

**See Supplementary Video 3**

**Supplementary Video 4: Moderate liver toxicity.**

**See Supplementary Video 4**

**Supplementary Video 5: Severe liver toxicity with predominant sinusoidal dilatation.**

**See Supplementary Video 5**

**Supplementary Video 6: Severe liver toxicity with predominant sinusoidal.**

**See Supplementary Video 6**

**Supplementary Video 7: Equal severity of steatosis and sinusoidal dilatation.**

**See Supplementary Video 7**
